# Supplementary material for: Whole-Genome DNA Methylation Profiling Identifies Epigenetic Signatures of Uterine Carcinosarcoma
Source: PubMed Central journal article supplement — Neoplasia. 2017 Jan 12;19(2):100–11. doi: 10.1016/j.neo.2016.12.009 (PMC5237802; doi:10.1016/j.neo.2016.12.009), 2017-01-12

A ■ 1 probe ■ 2 probes ■ No probe

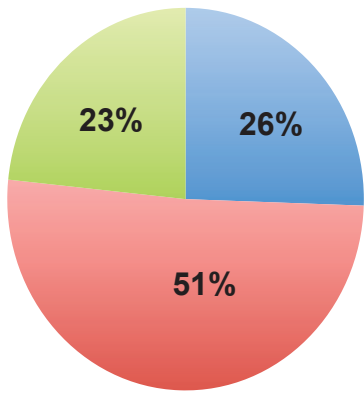

Hypermethylated DMRs  
(UCS common DMRs)

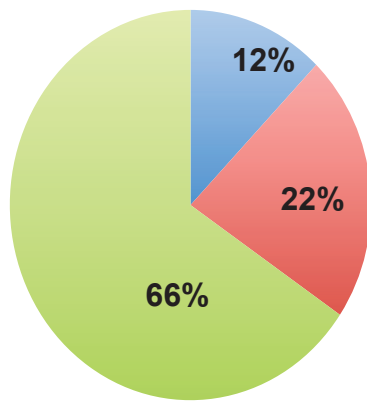

Hypomethylated DMRs  
(UCS common DMRs)

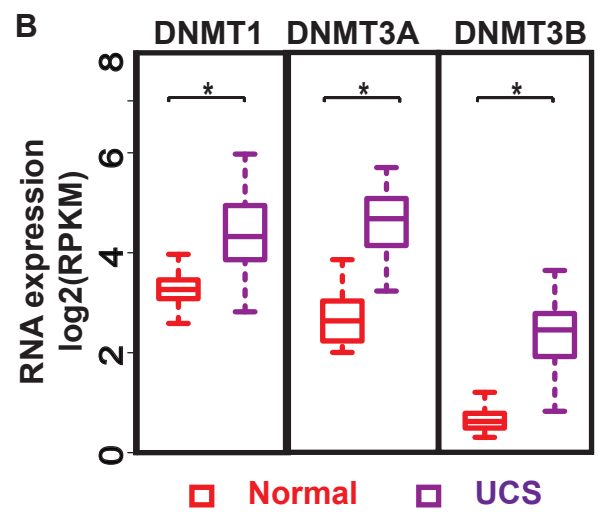

C

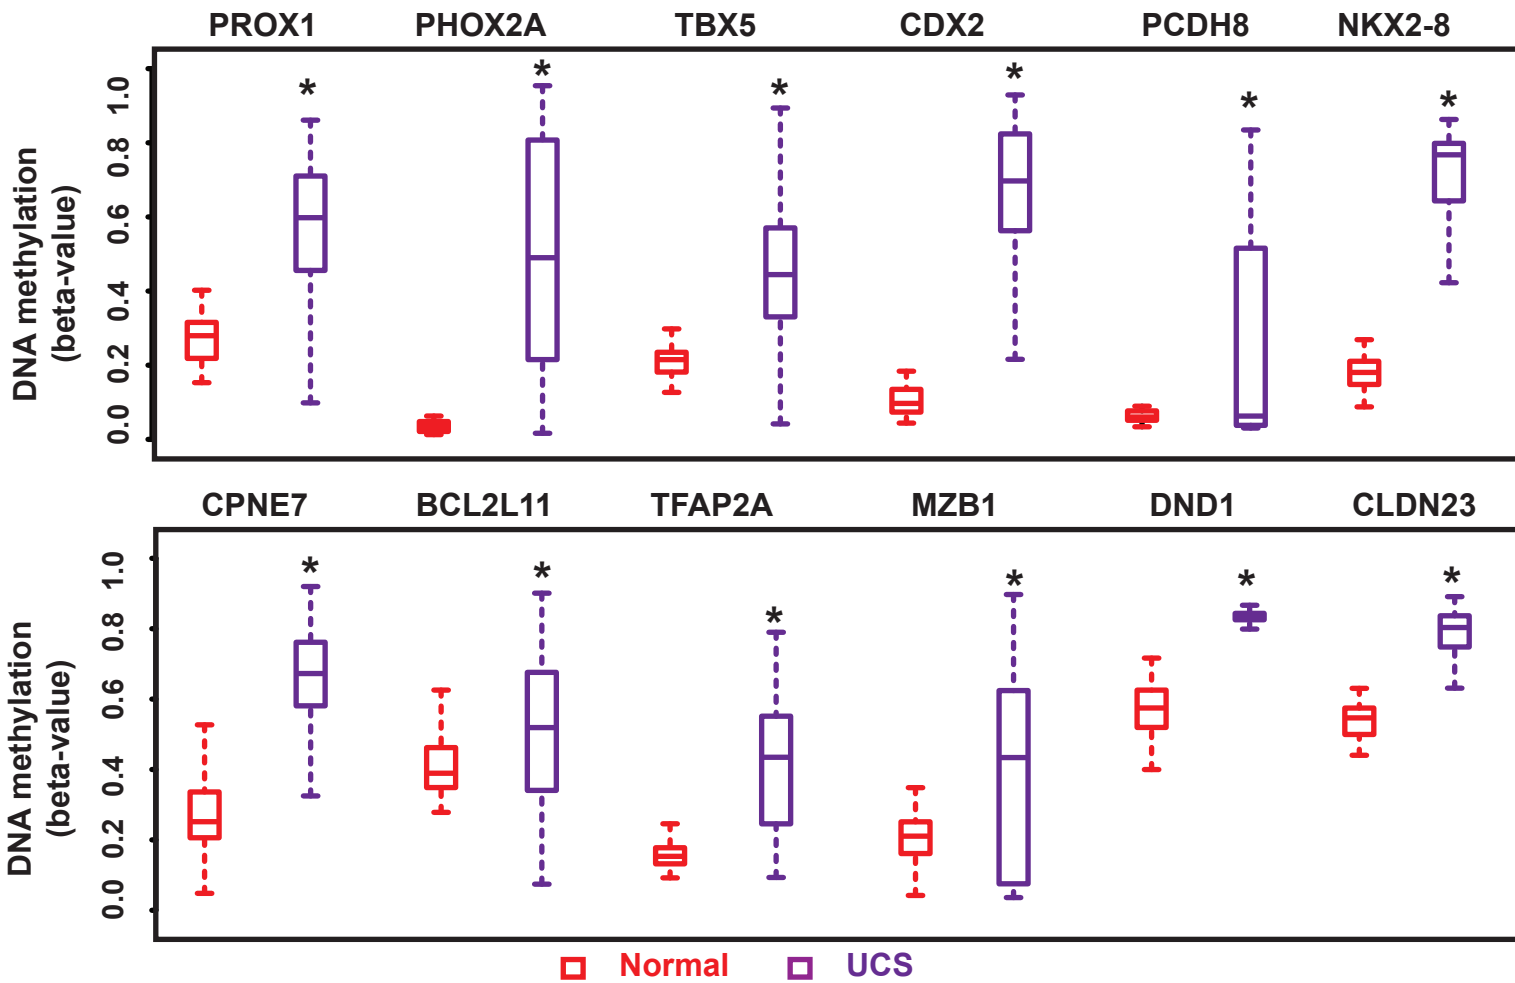

D

**GO Biological Process**

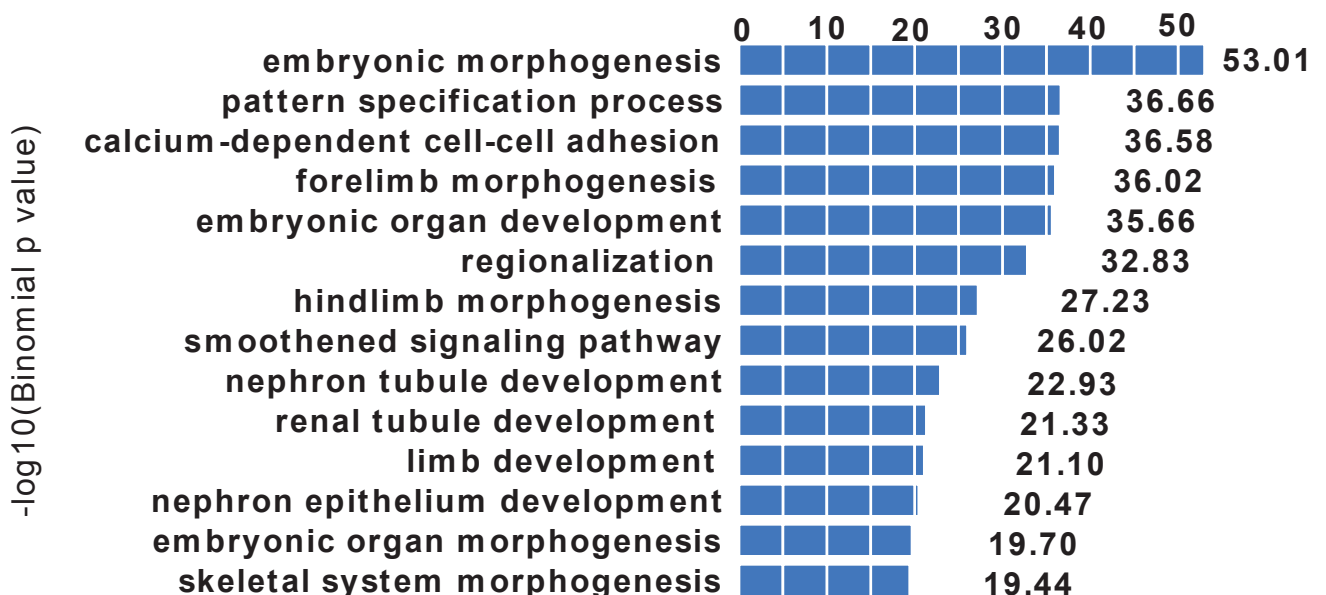

Supplement: mmc2.pdf [file mmc2.pdf]
