# Supplementary figures and images for: Whole-Genome DNA Methylation Profiling Identifies Epigenetic Signatures of Uterine Carcinosarcoma
Source: PubMed Central journal article supplement — Neoplasia. 2017 Jan 12;19(2):100–11. doi: 10.1016/j.neo.2016.12.009 (PMC5237802; doi:10.1016/j.neo.2016.12.009), 2017-01-12

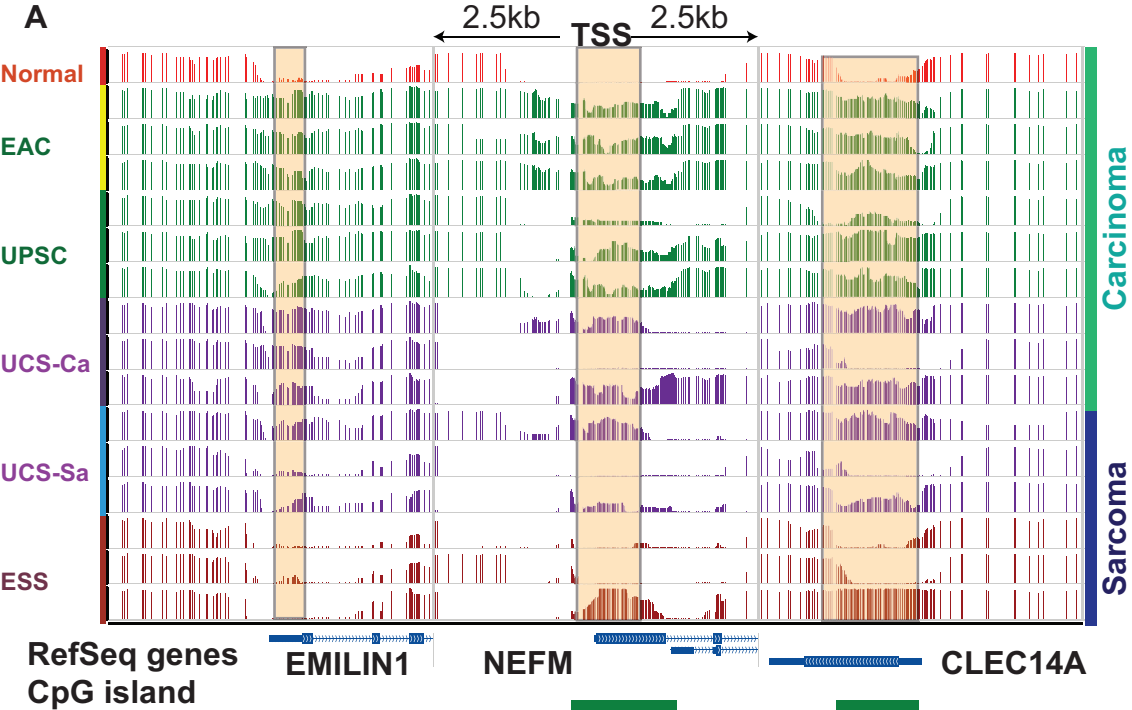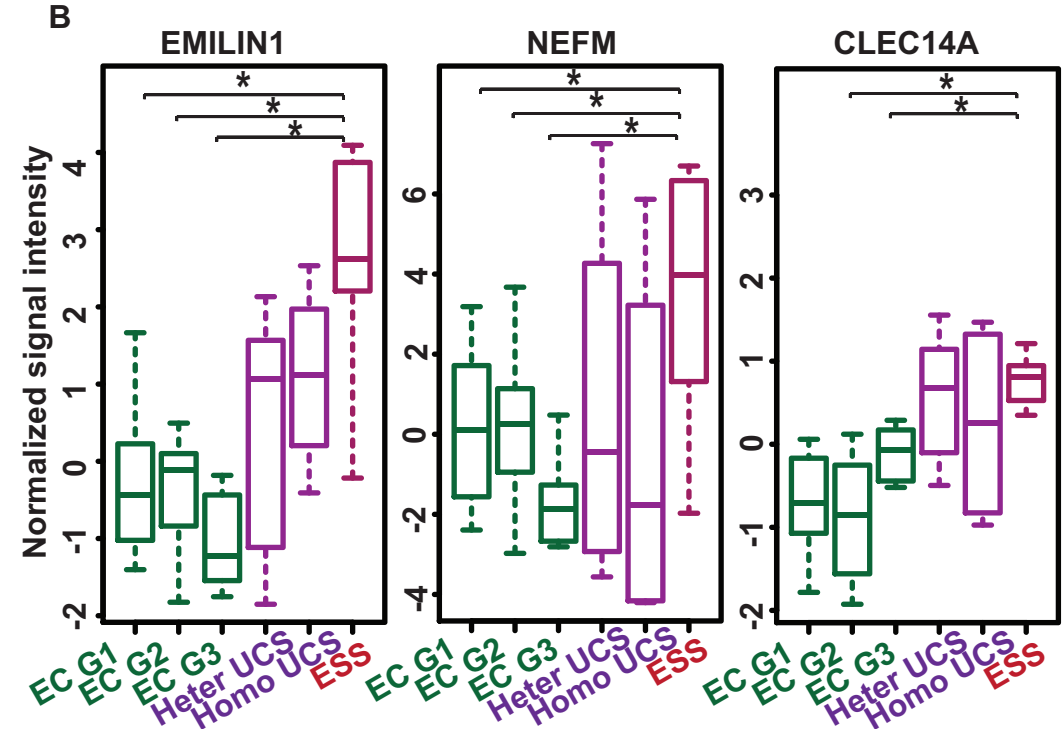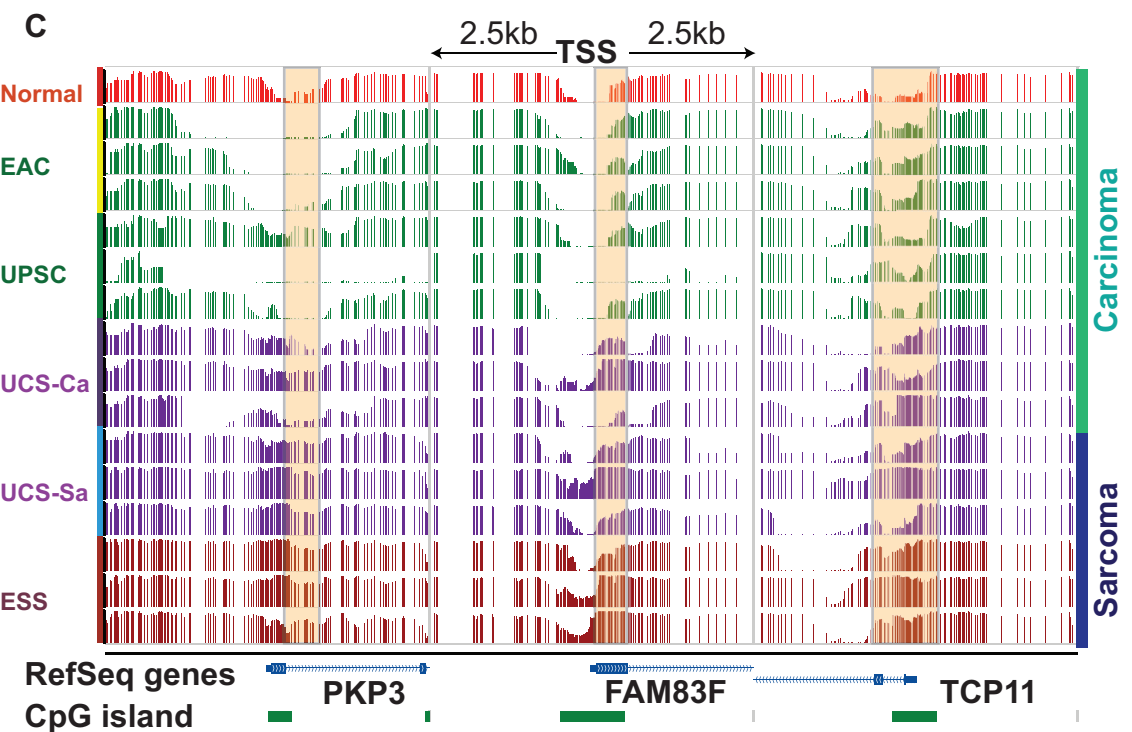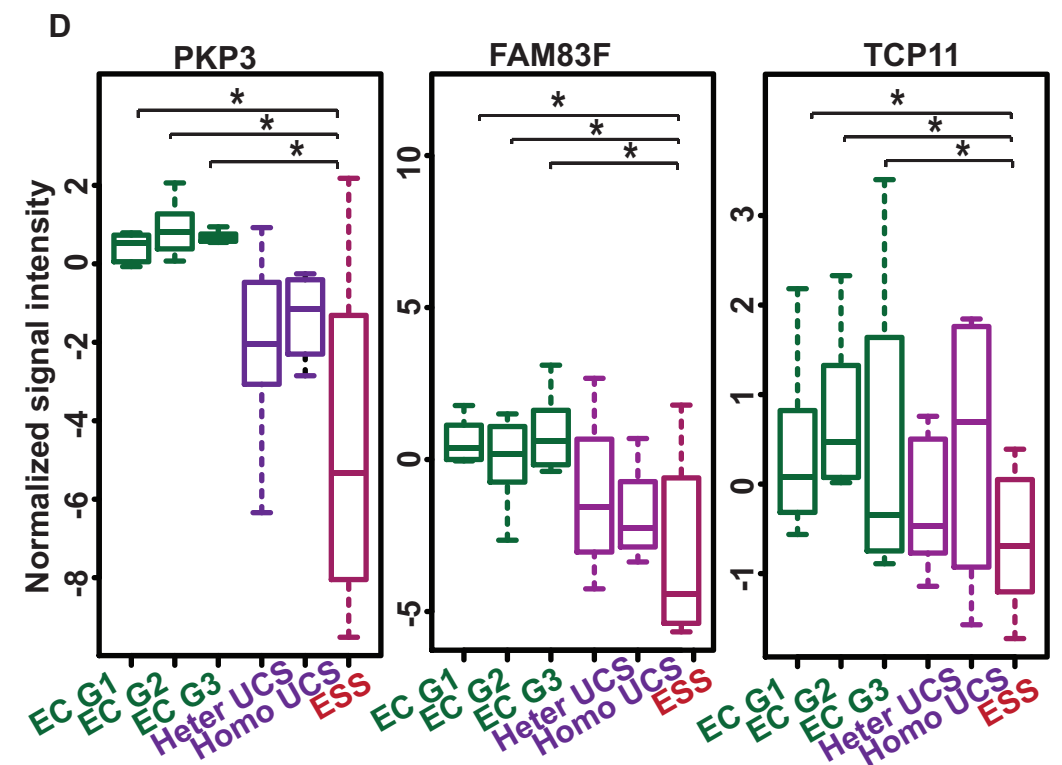

Supplement: mmc3.pdf [file mmc3.pdf]

miR429 expression (intensity)

3  
2  
1  
0

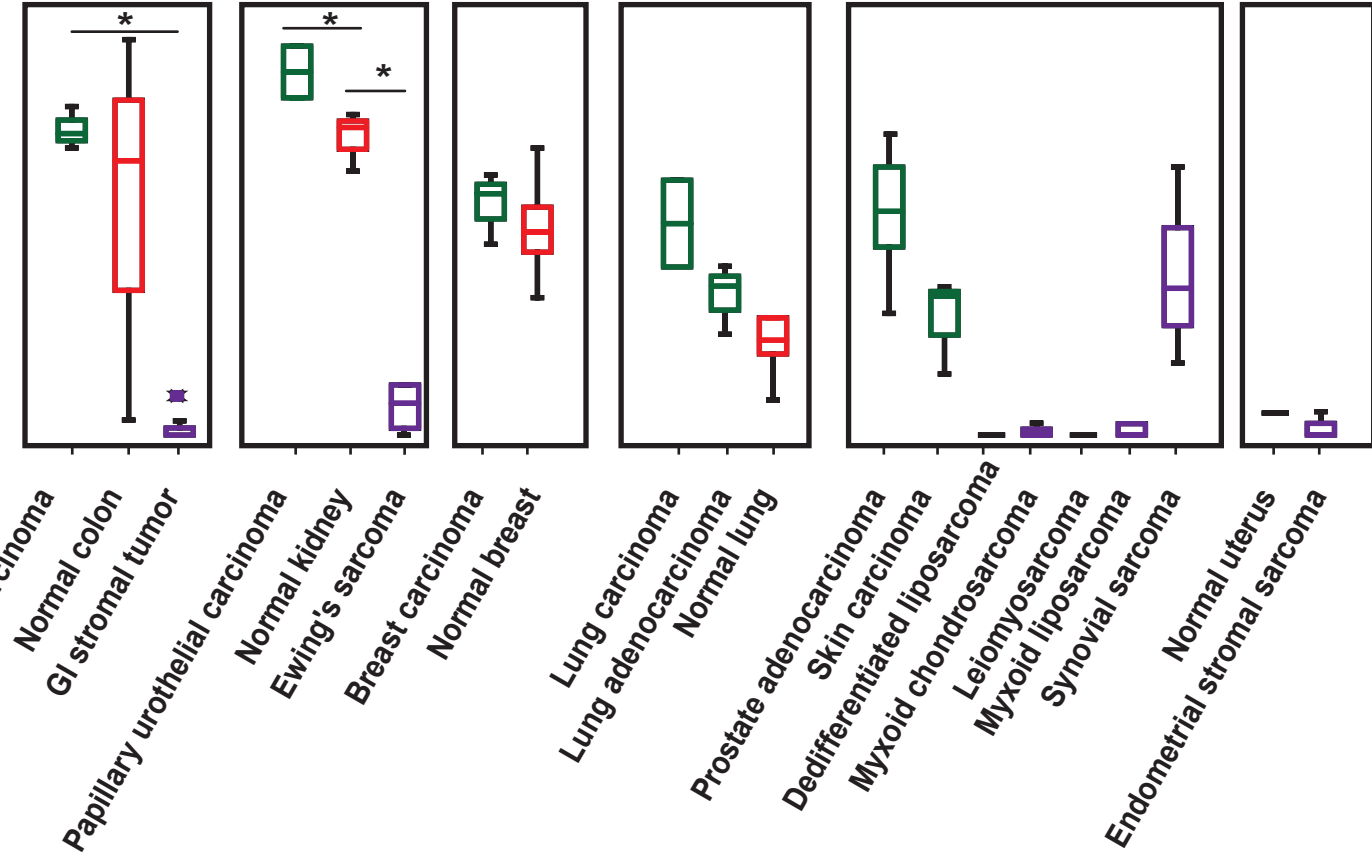

Supplement: mmc4.pdf [file mmc4.pdf]
